# Supplementary material
Source: PubMed Central journal article supplement (PMC7843730)

# Supplement Figure 1A

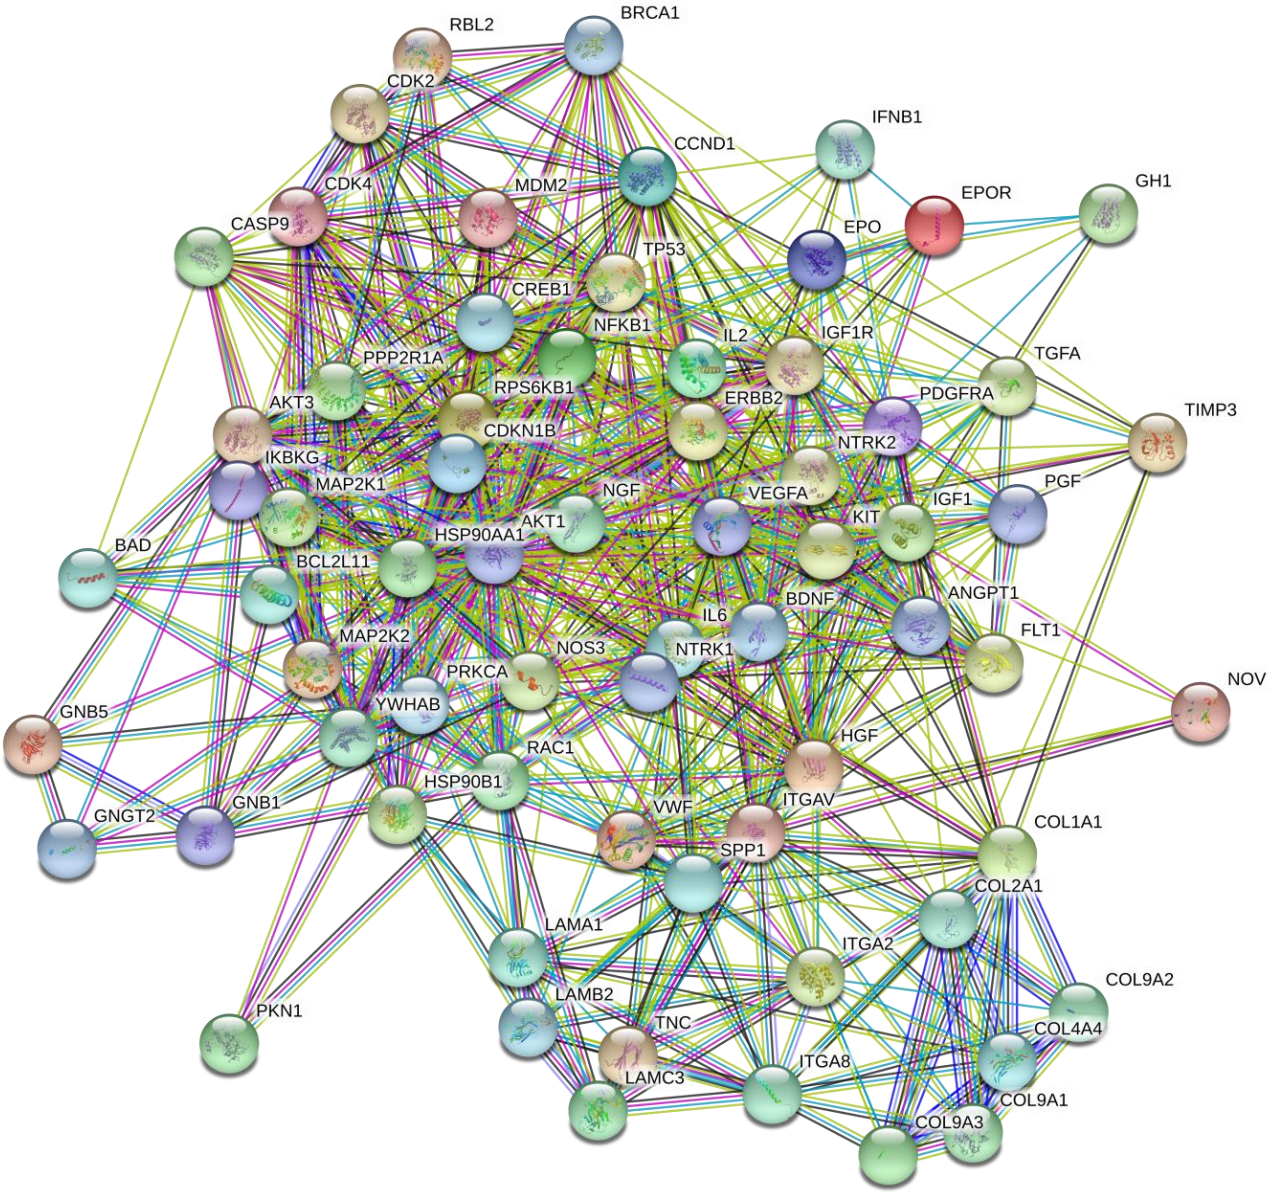



# Supplement Figure 1C

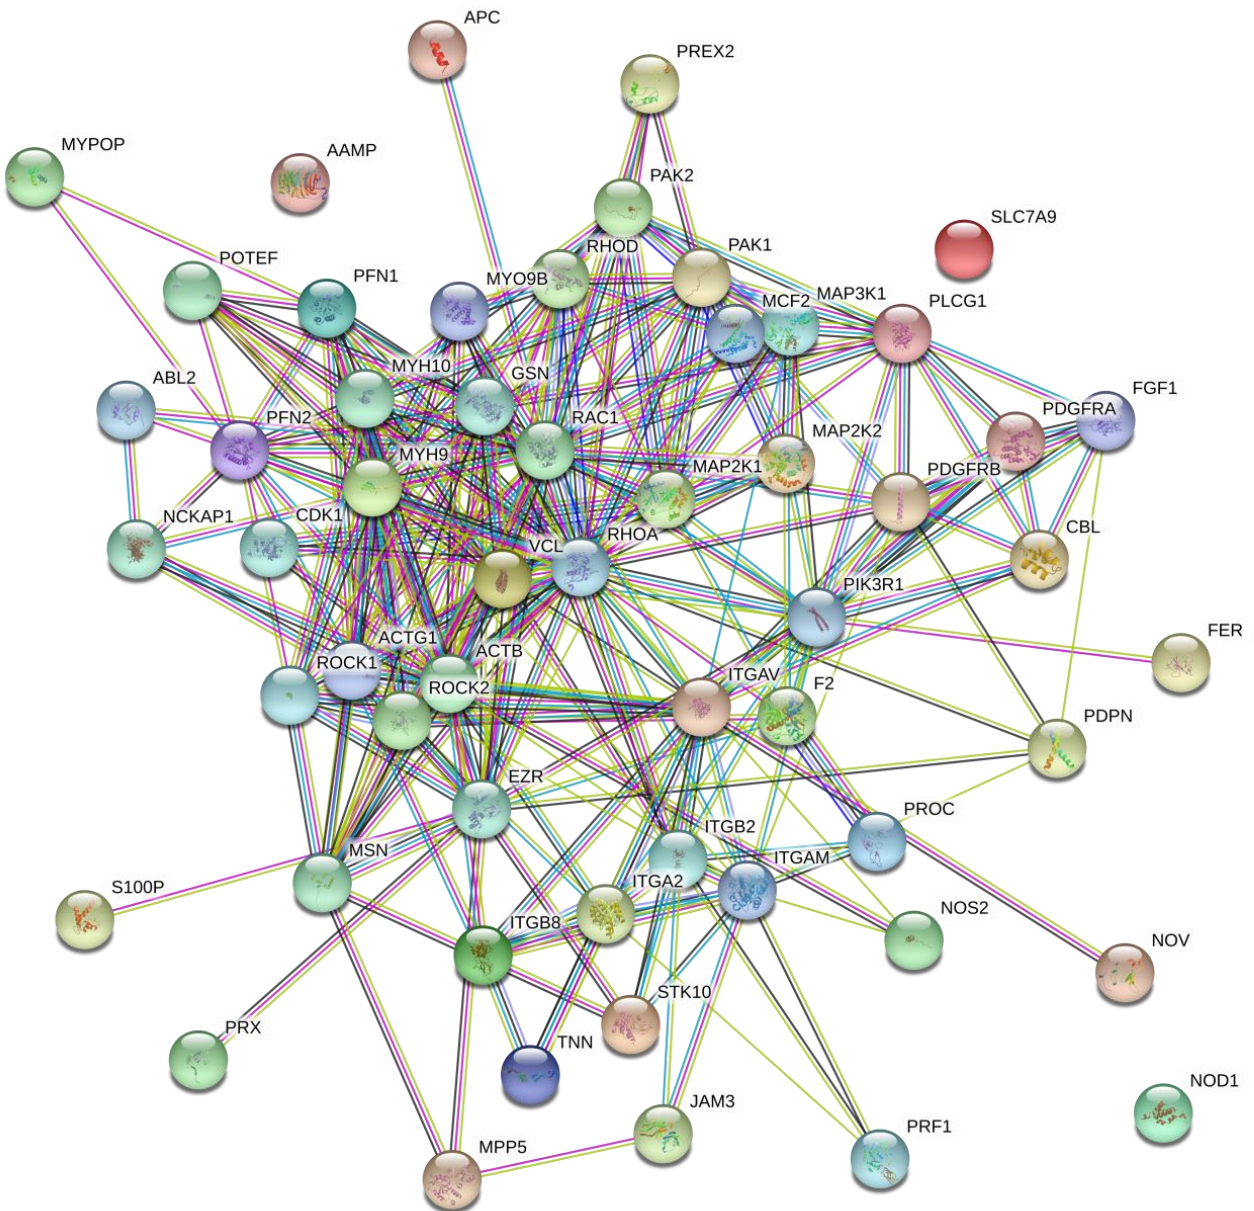

# Supplement Figure 1D

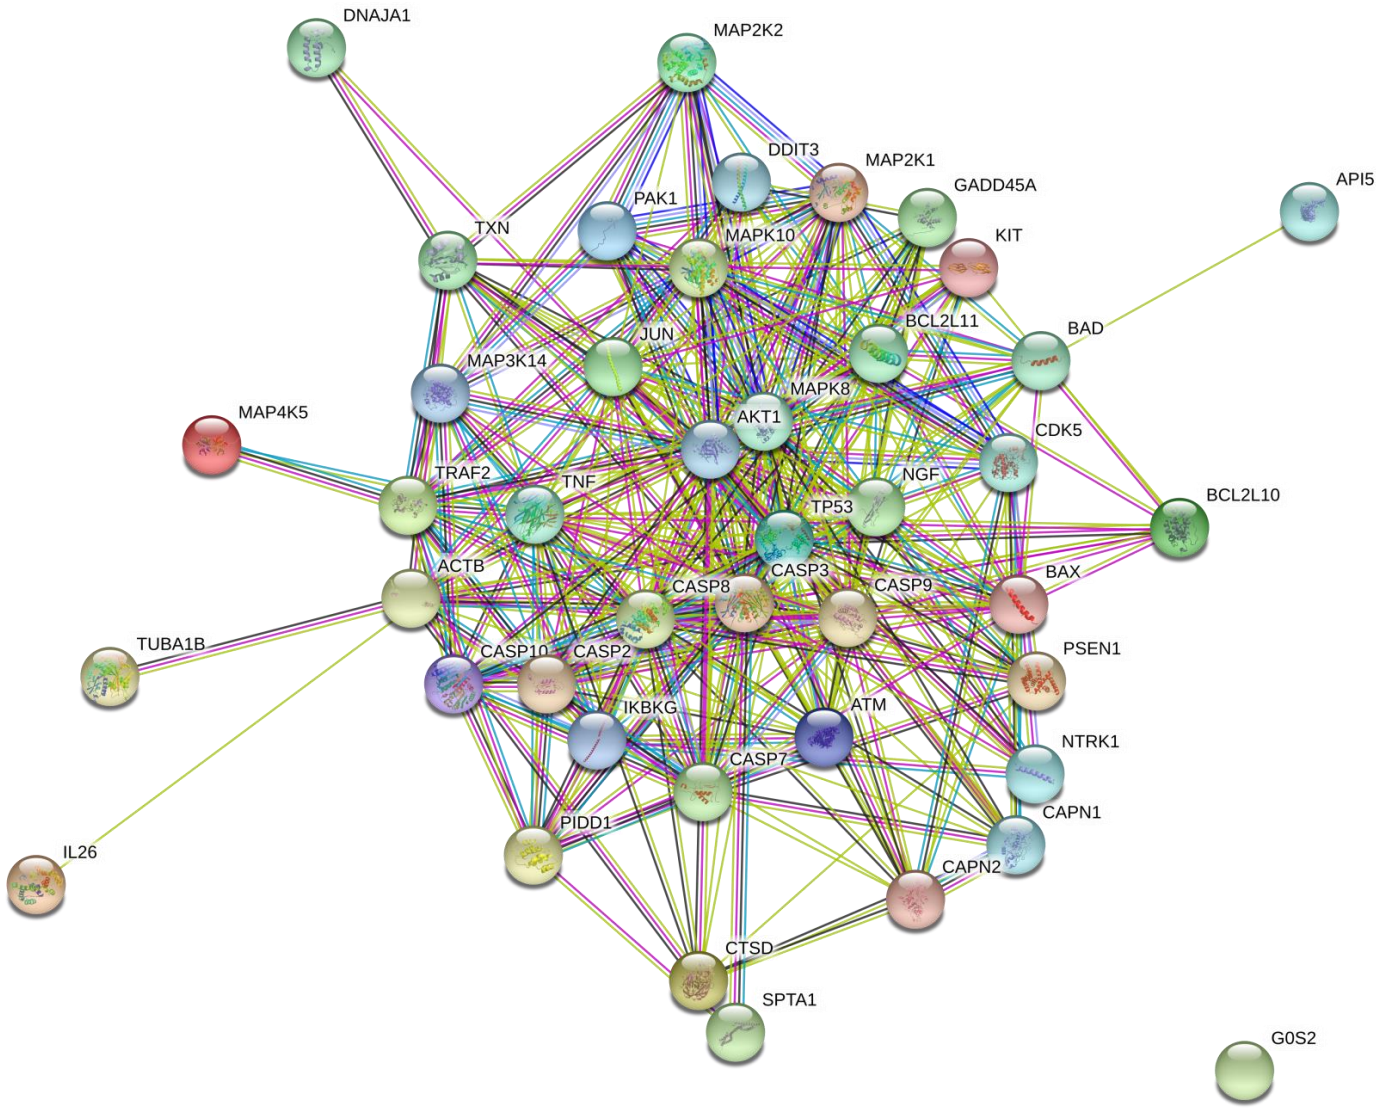

# Supplement Figure 1E

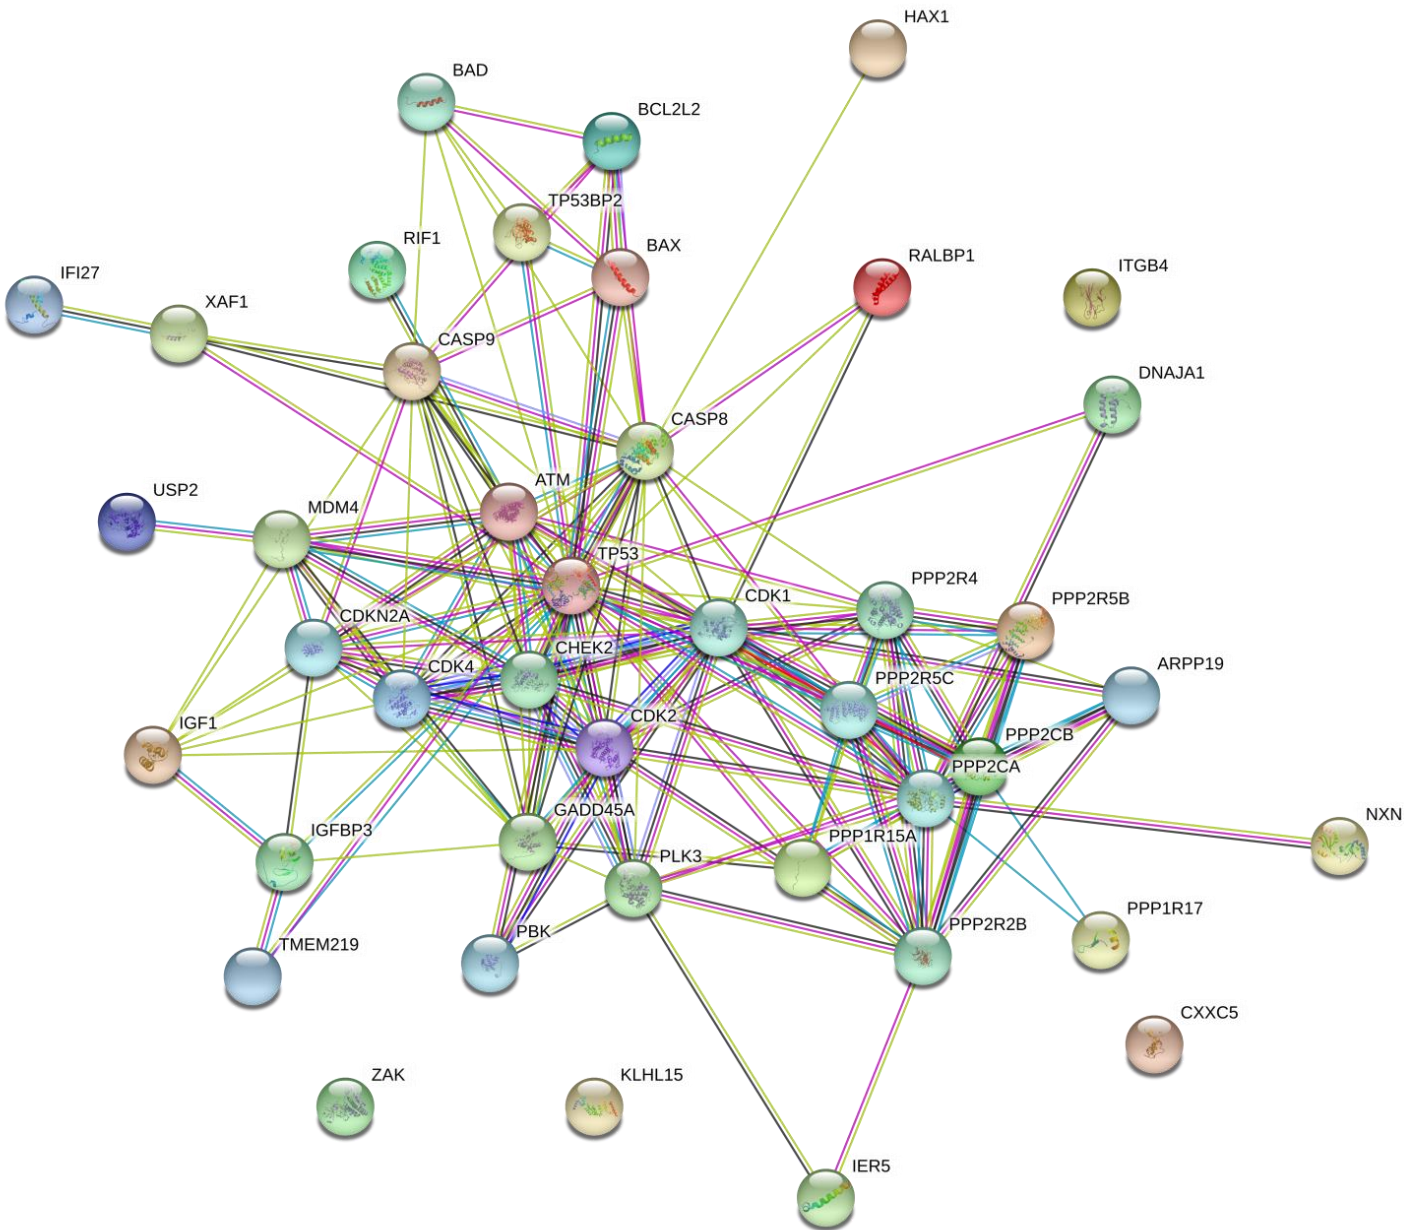

# Supplement Figure 1F

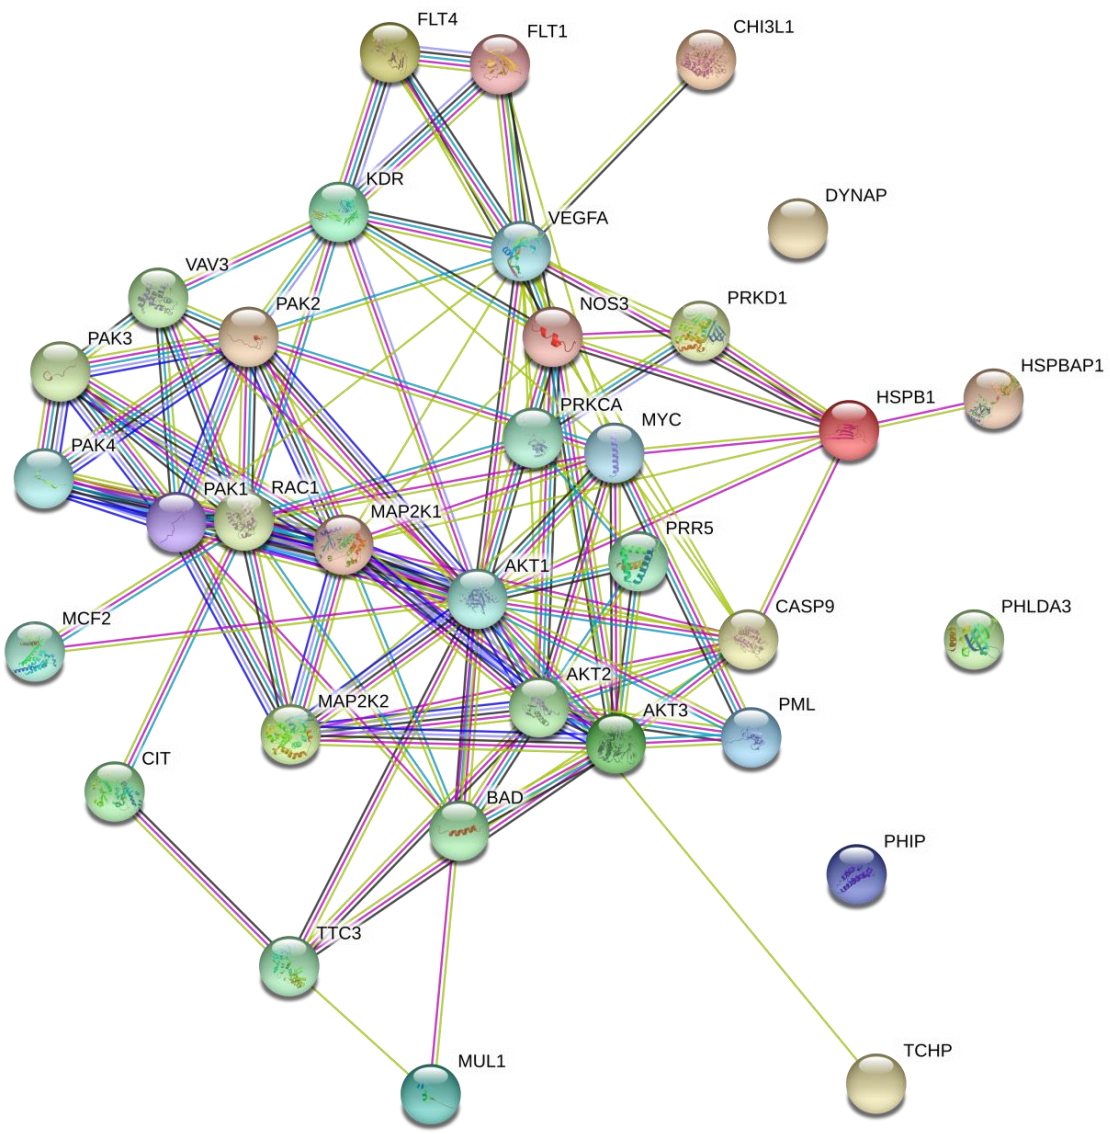



# Supplement Figure 1H

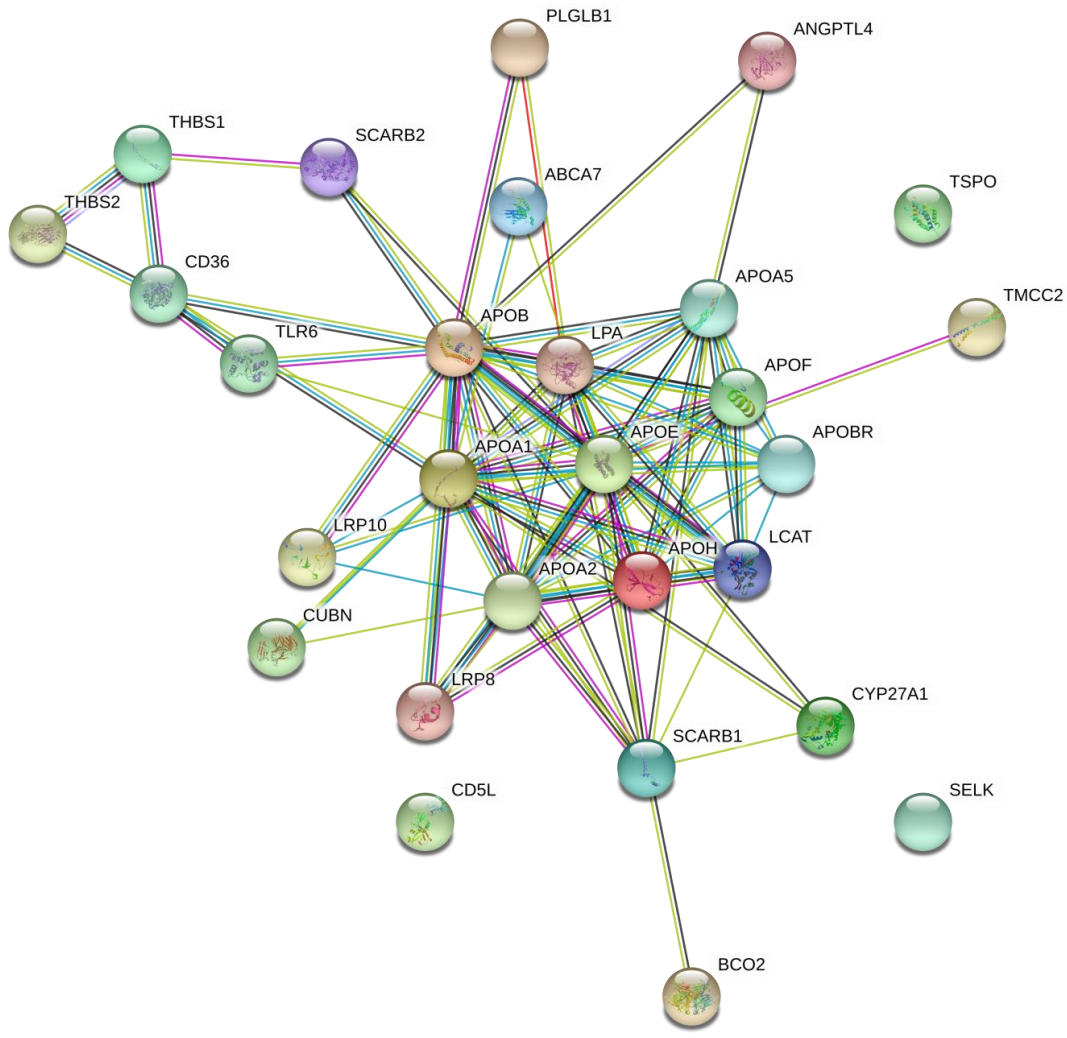

Supplement: 40200_2020_570_MOESM1_ESM.pdf [file 40200_2020_570_MOESM1_ESM.pdf]
