# Supplementary material
Source: PubMed Central journal article supplement (PMC7843730)

# Supplement Figure 2B

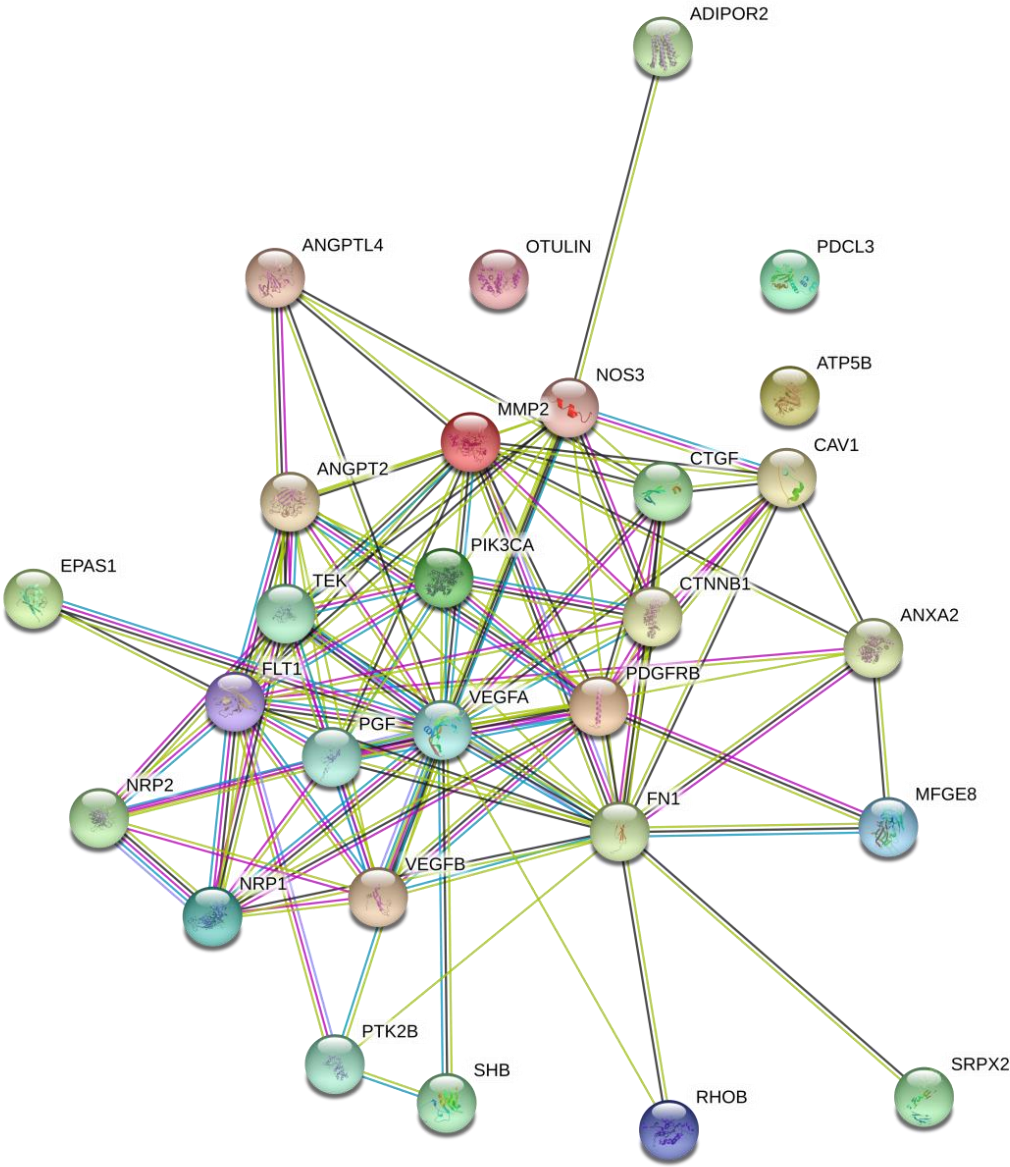



# Supplement Figure 2D

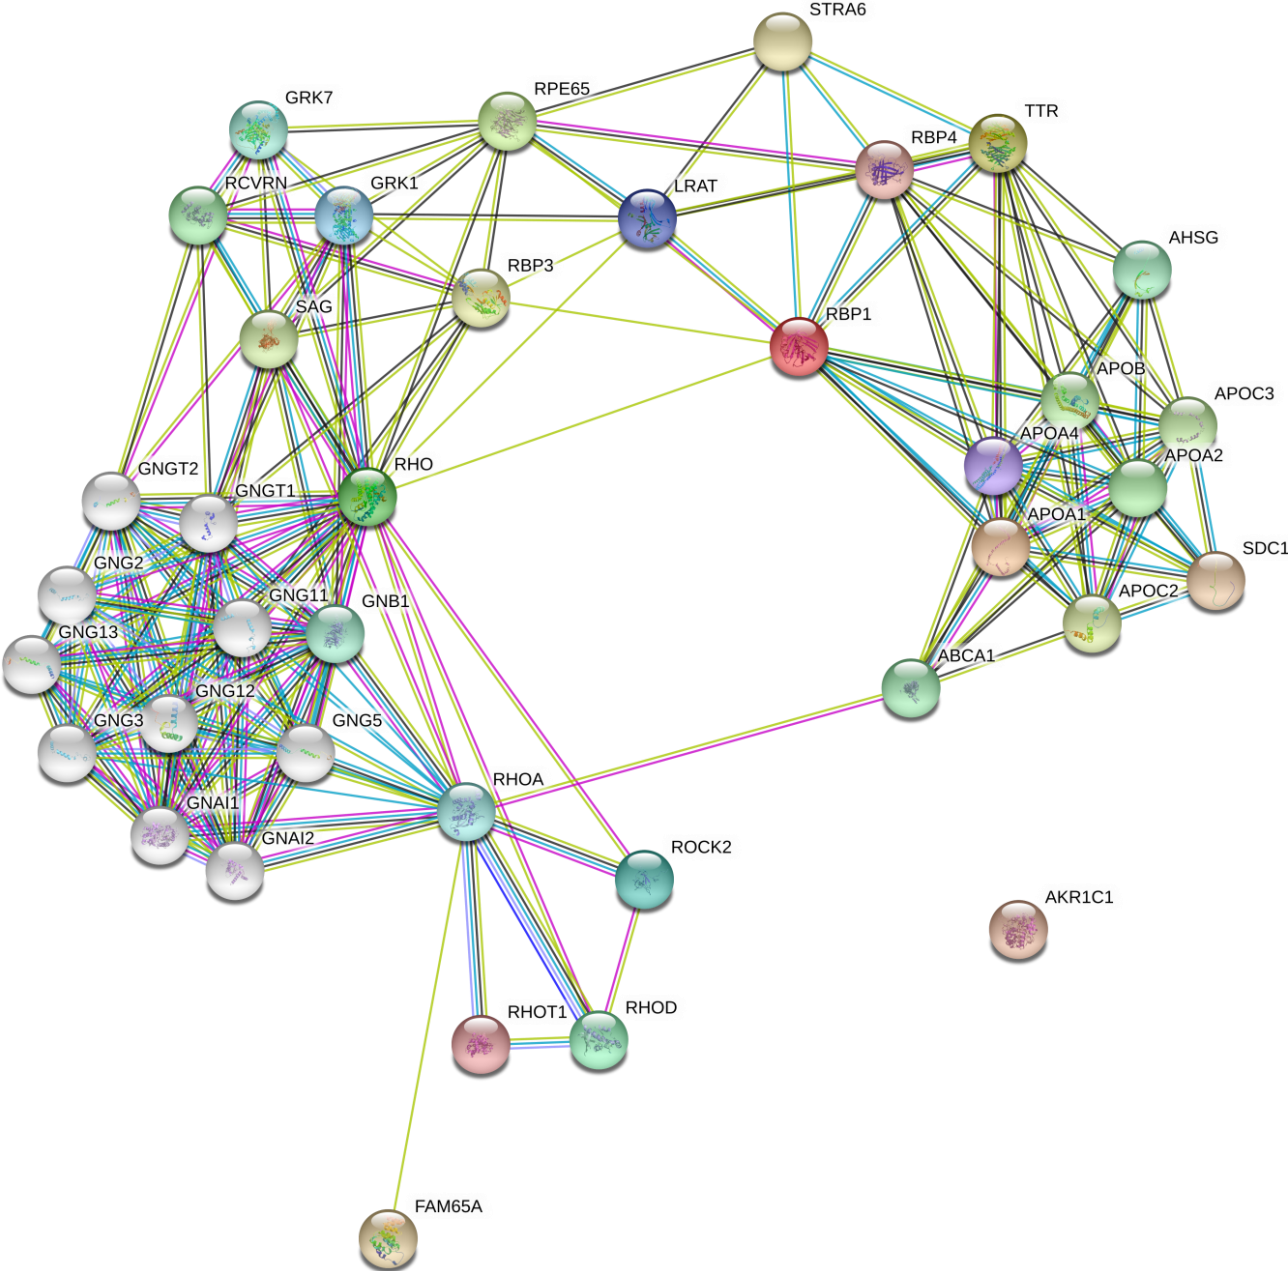

# Supplement Figure 2E

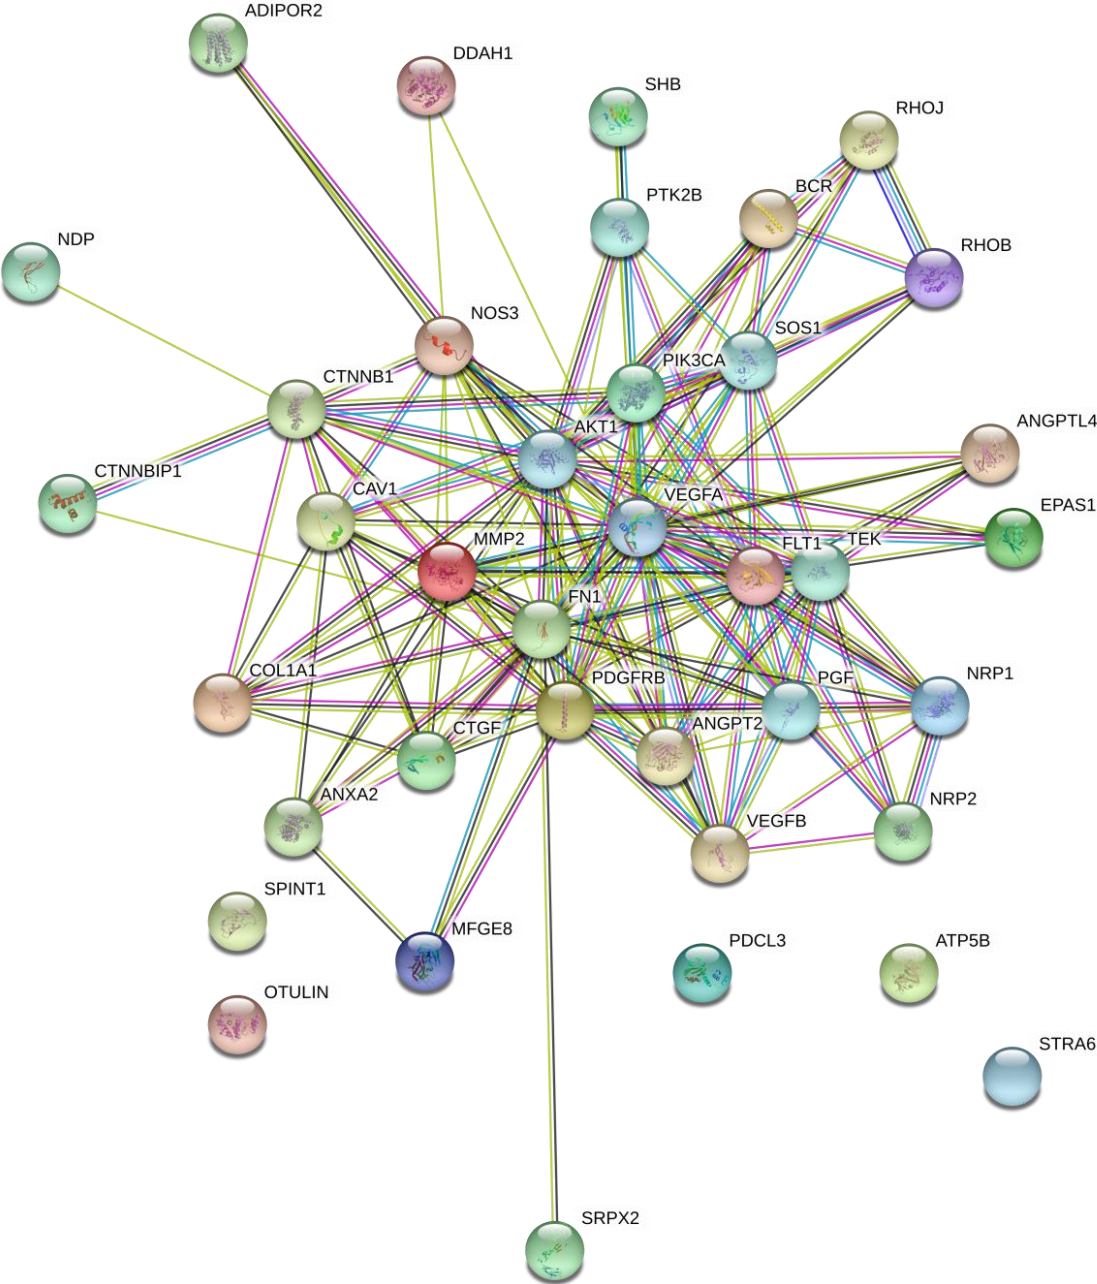

# Supplement Figure 2F

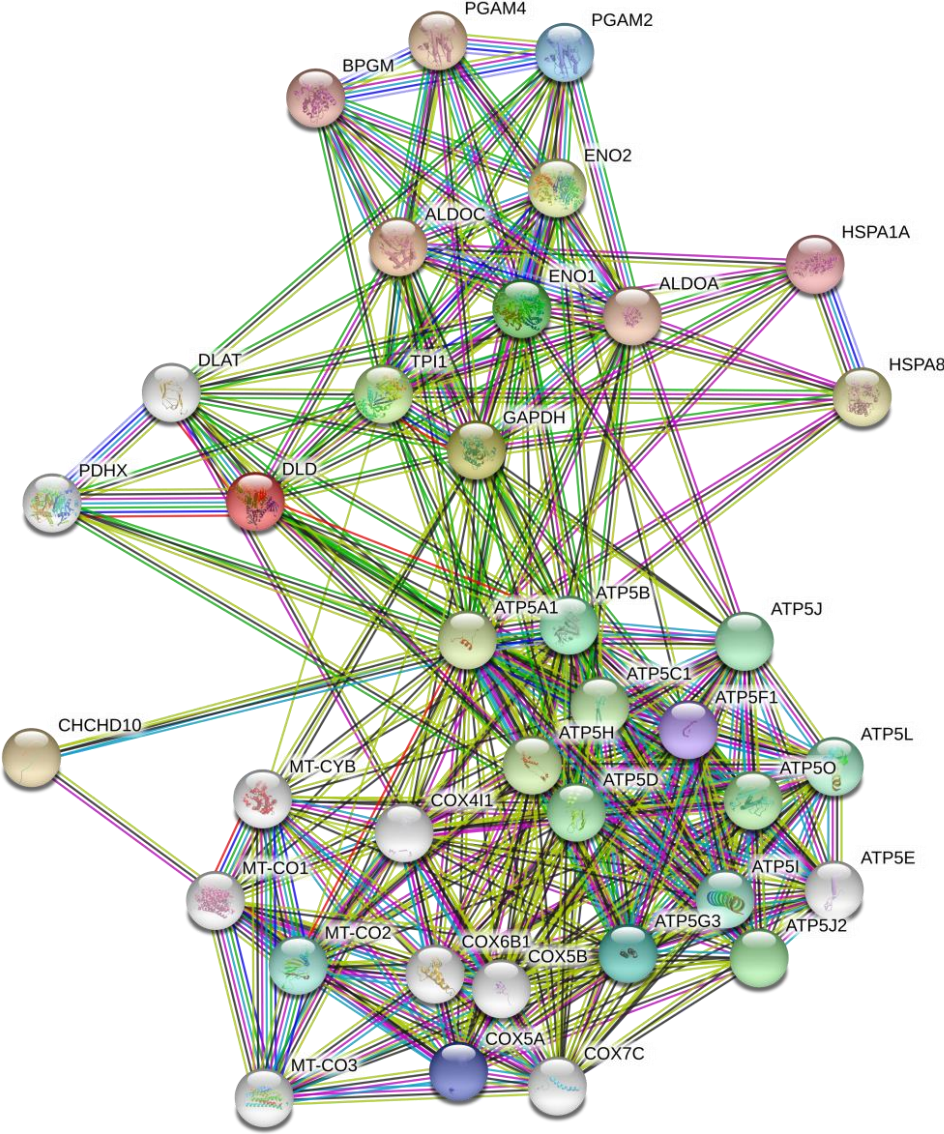

# Supplement Figure 2G

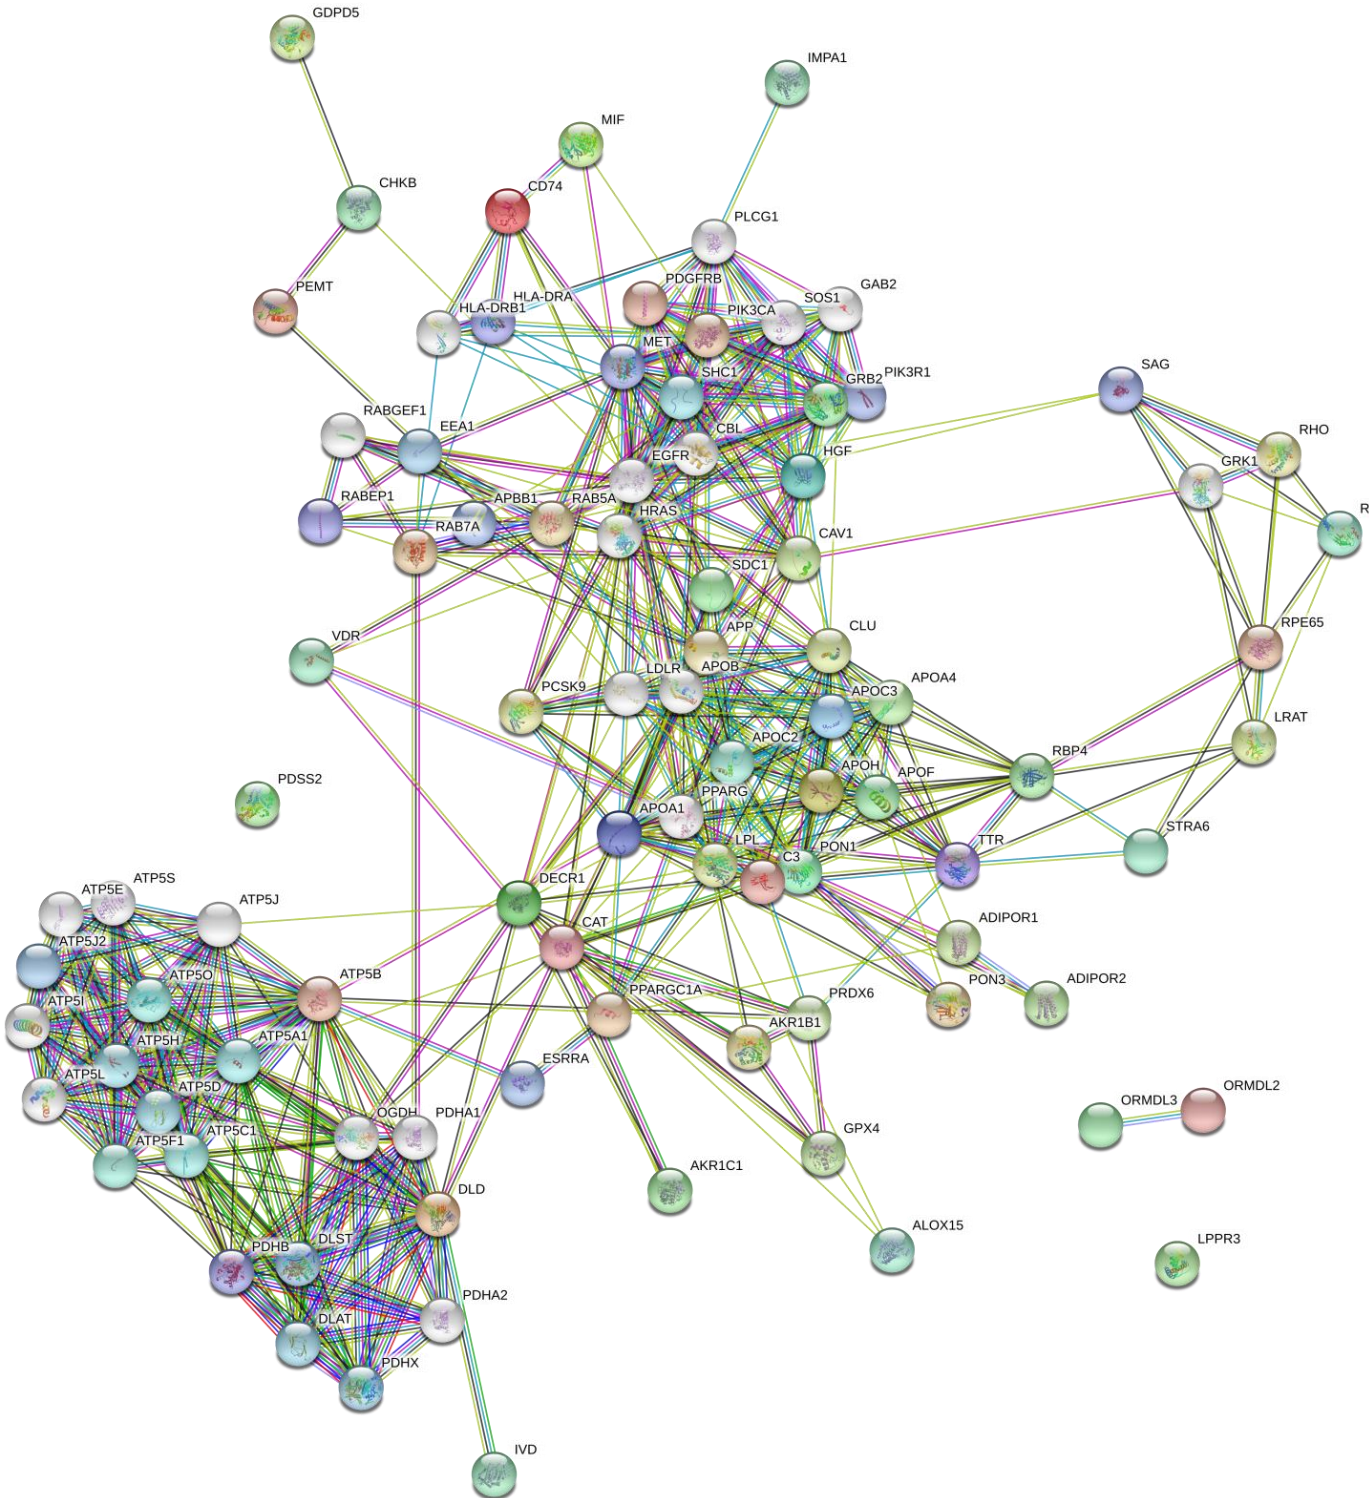





# Supplement Figure 2I

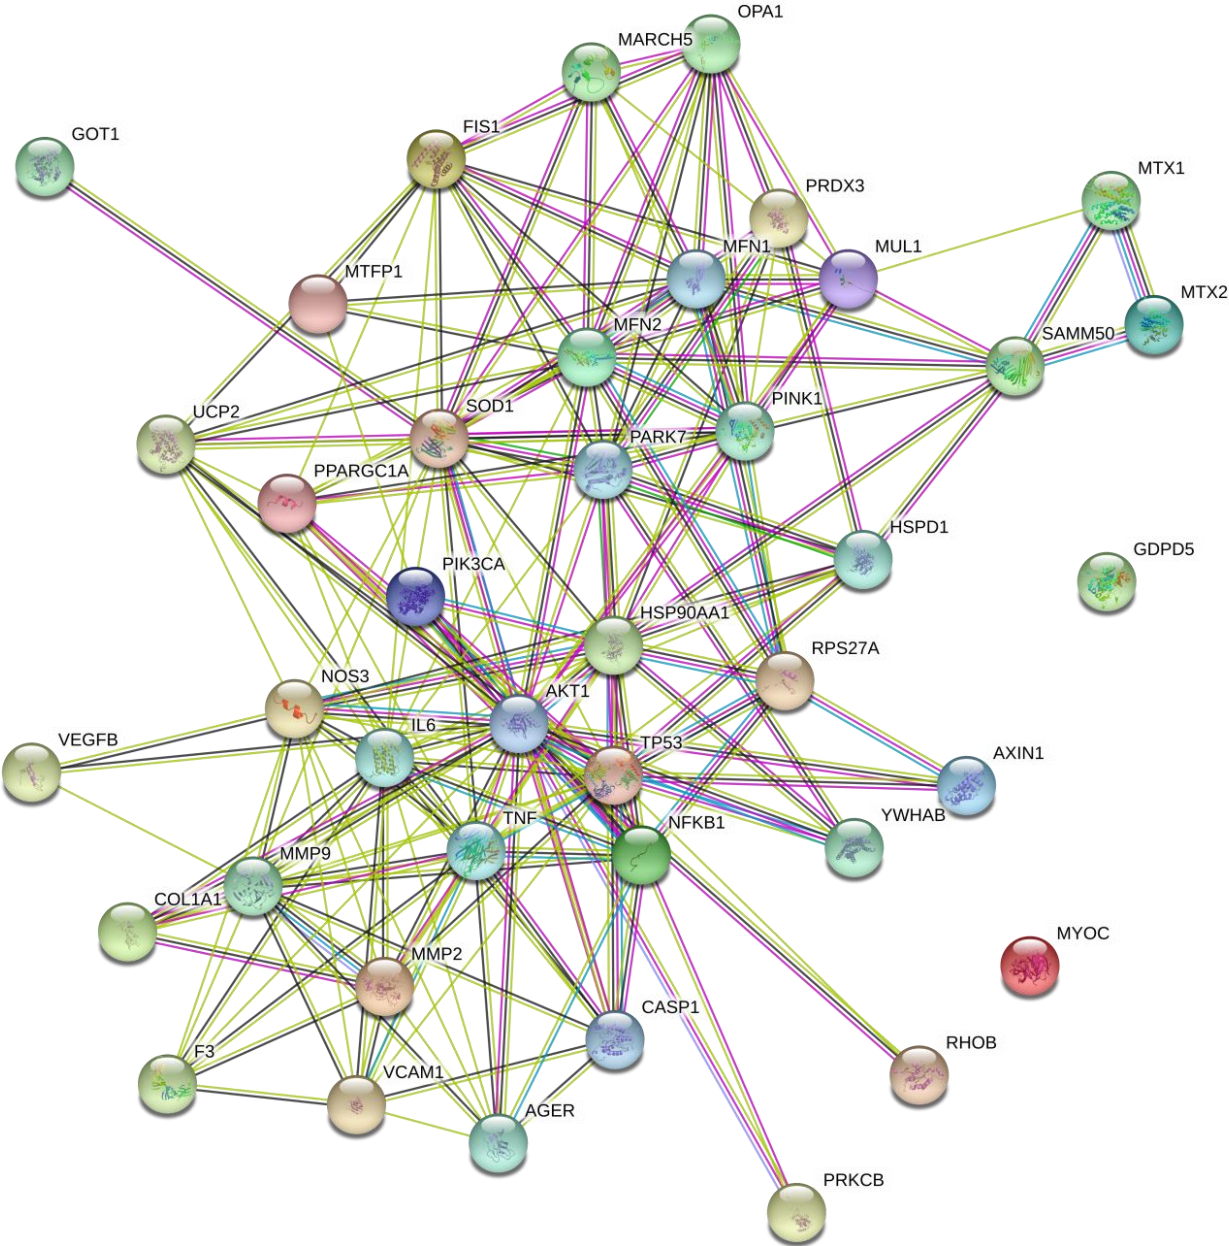

# Supplement Figure 2J

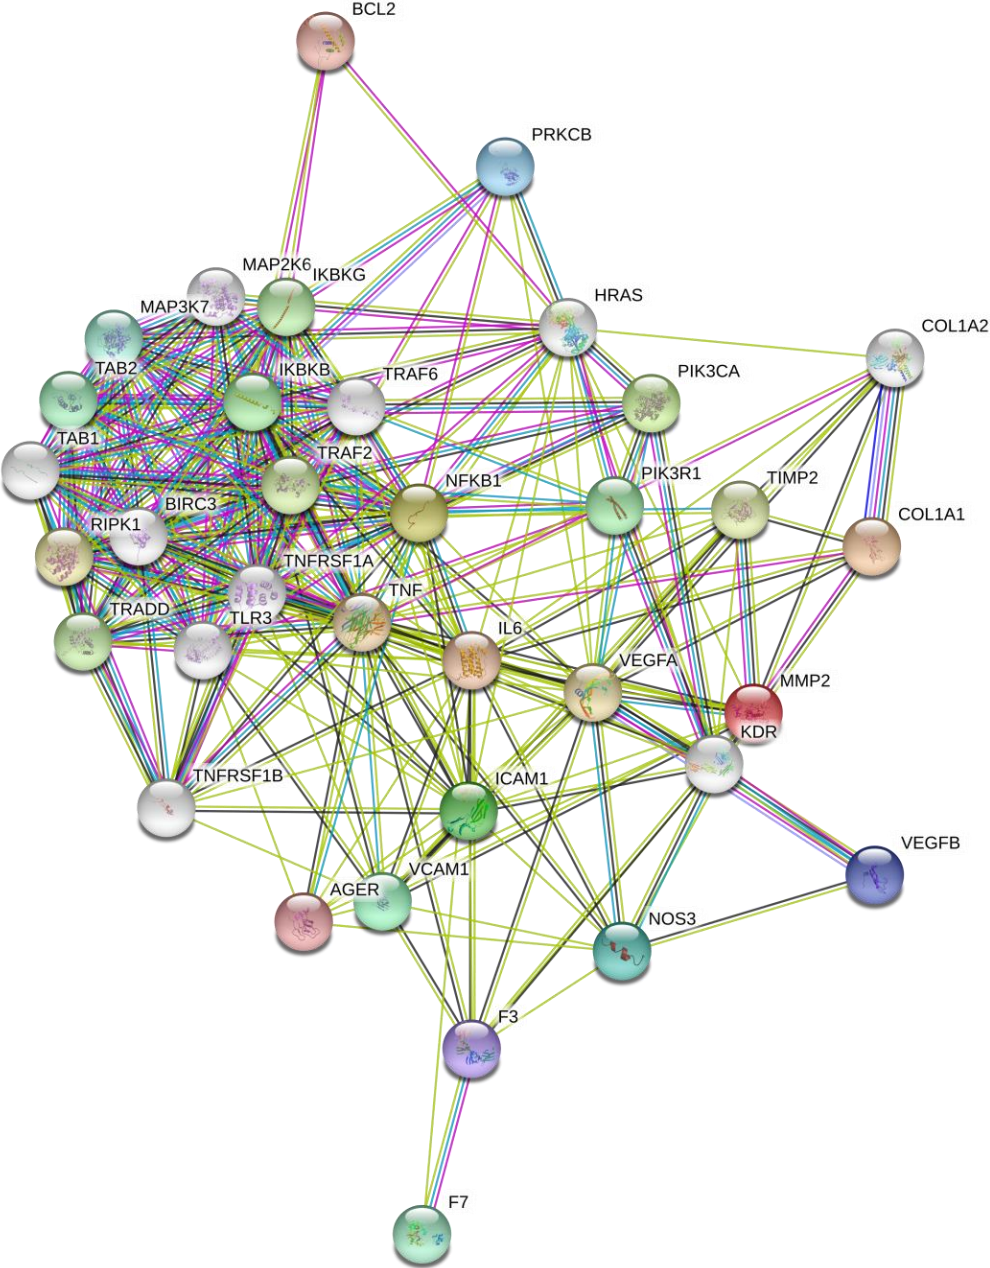

Supplement: 40200_2020_570_MOESM2_ESM.pdf [file 40200_2020_570_MOESM2_ESM.pdf]
